# Supplementary material for: Therapeutic Vulnerability to ATR Inhibition in Concurrent NF1 and ATRX-Deficient/ALT-Positive High-Grade Solid Tumors
Source: MDPI journal article supplement (doi:10.3390/cancers14123015), 2022-06-19
Supplement: s1 [file s1]

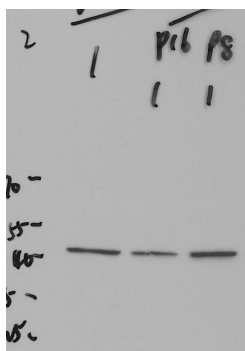

Fig2A-Actin-1

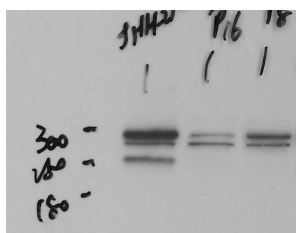

Fig2A-NF1-1

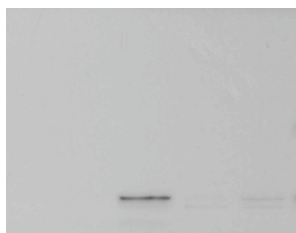

Fig2A-NF1-2

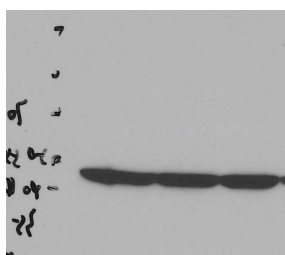

Fig2B-Actin-1

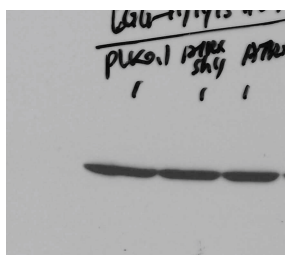

Fig2B-Actin-2

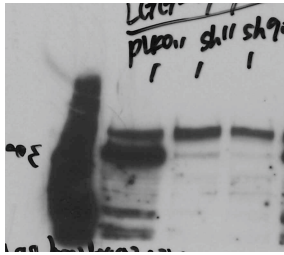

Fig2B-ATRX-1

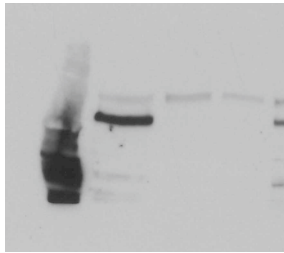

Fig2B-ATRX-2

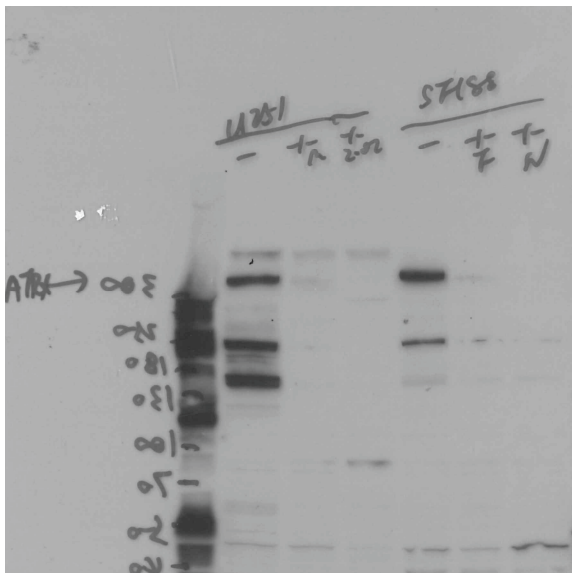

Fig3B-ATRX

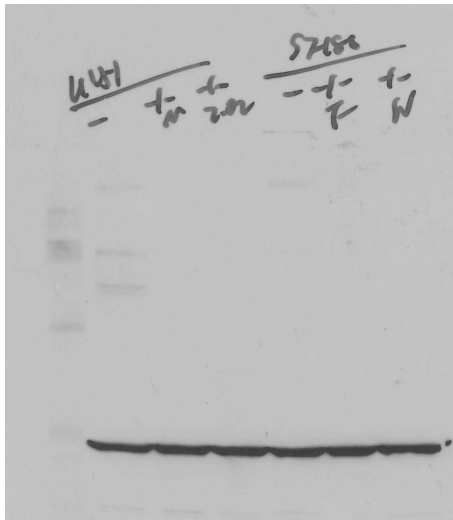

Fig3B-Tubulin-1

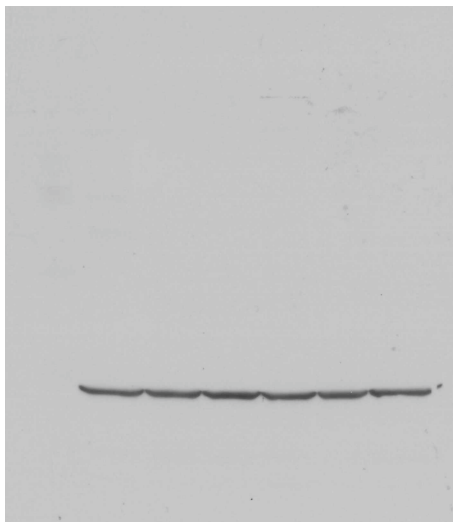

Fig3B-Tubulin-2

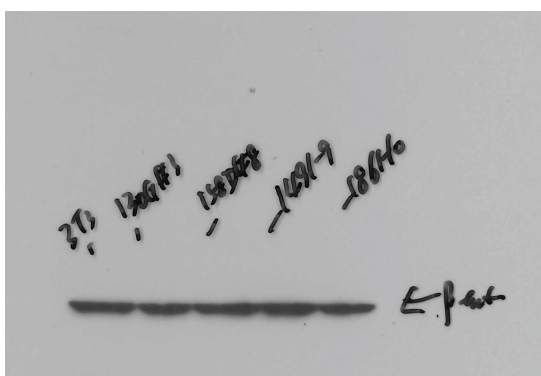

FigS1A-Actin

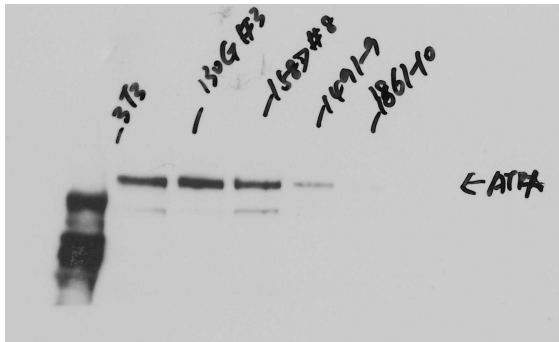

FigS1A-ATRX-1

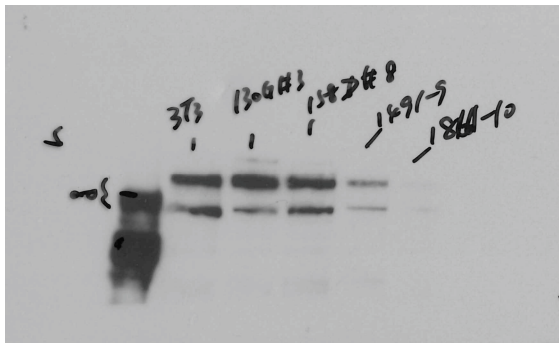

FigS1A-ATRX-2

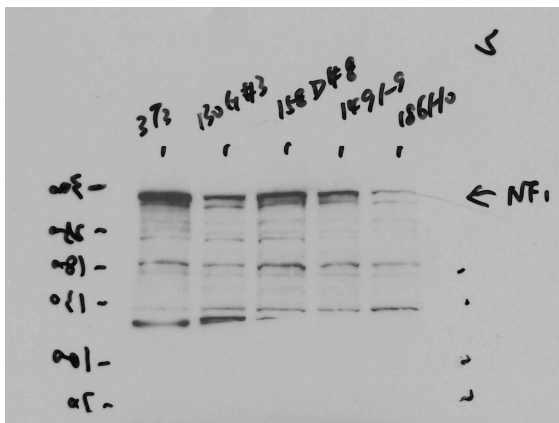

FigS1A-NF1-1

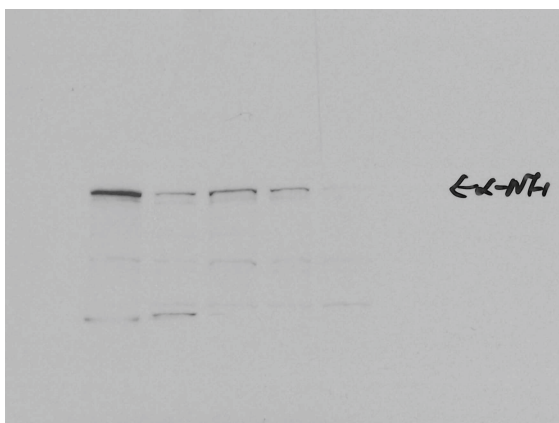

FigS1A-NF1-2



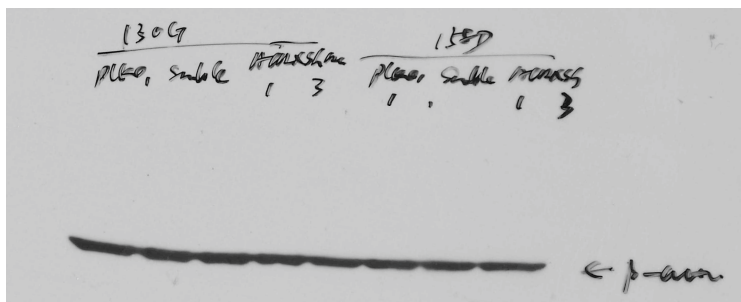

FigS1B-Actin-1

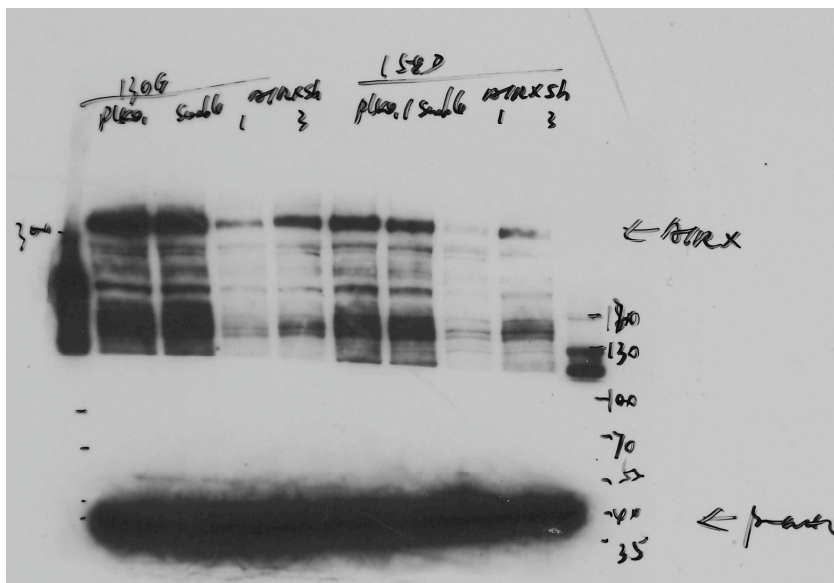

FigS1B-ATRX Actin

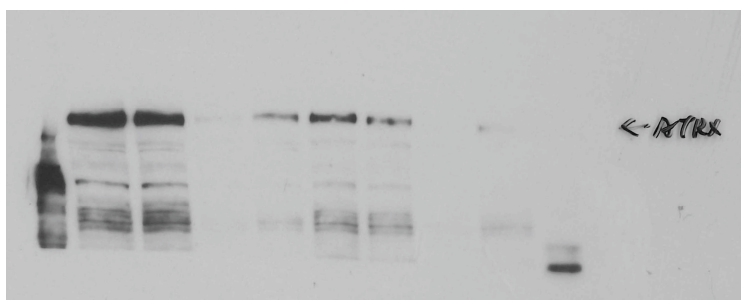

FigS1B-ATRX-1

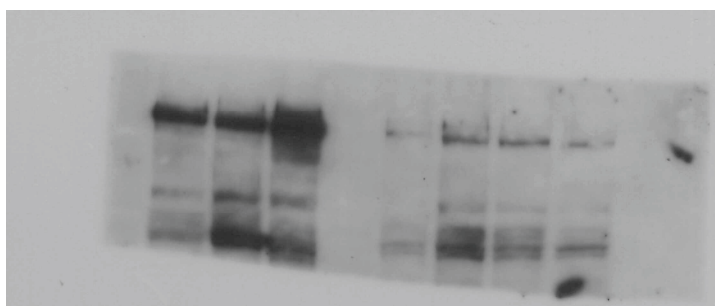



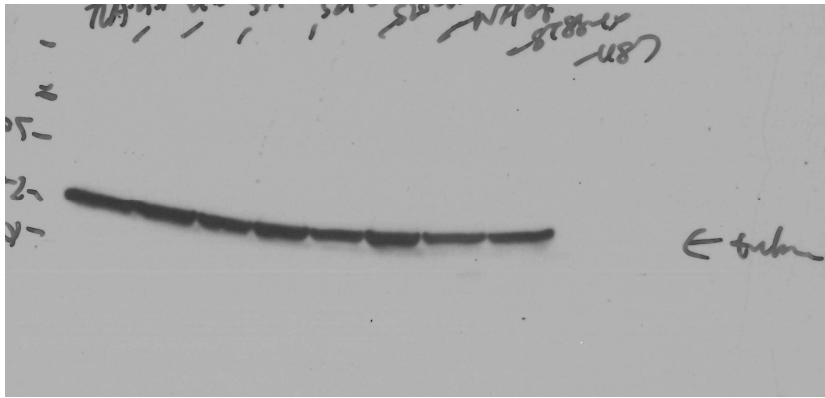

FigS2-Tubulin-2-1

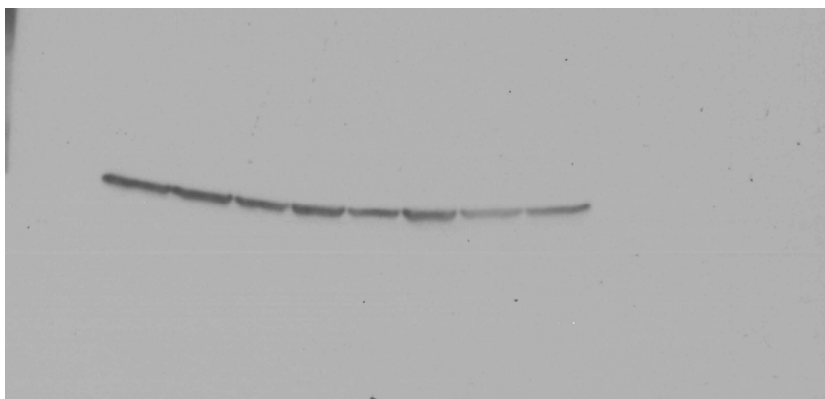

FigS2-Tubulin-2-2

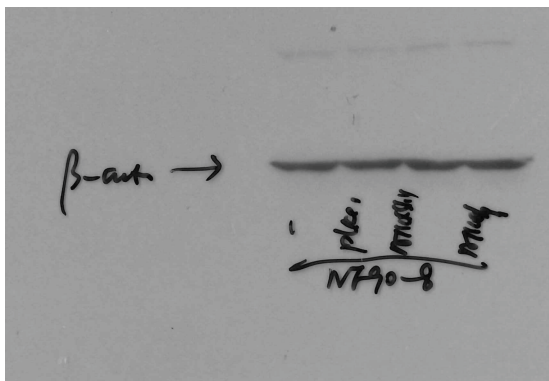

FigS5-Actin

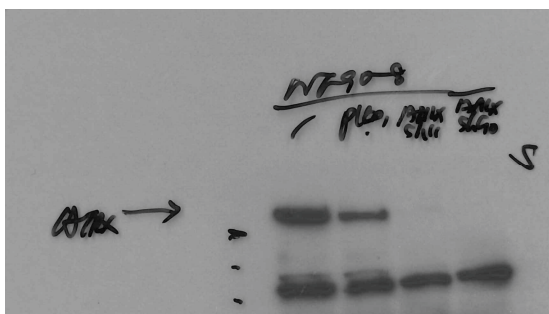

FigS5-ATRX

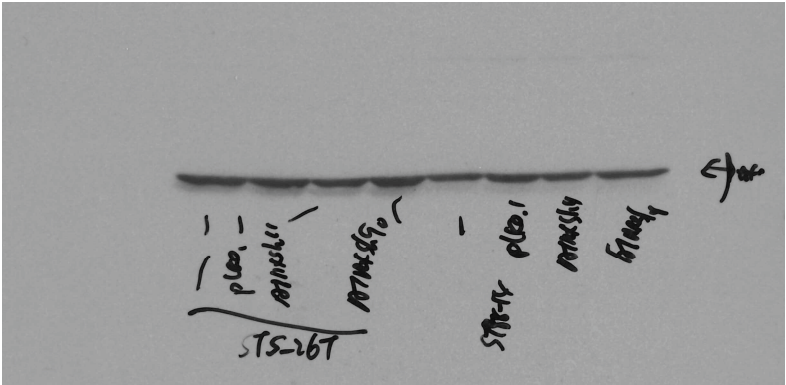

FigS6-Actin

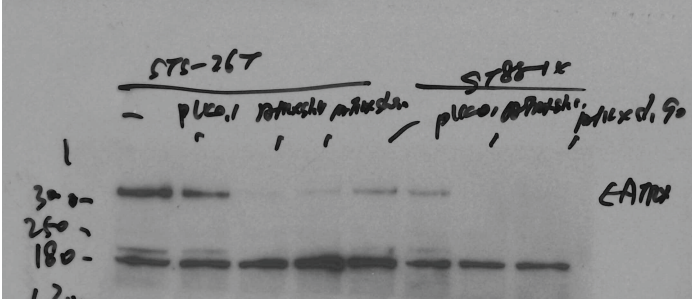

FigS6-ATRX

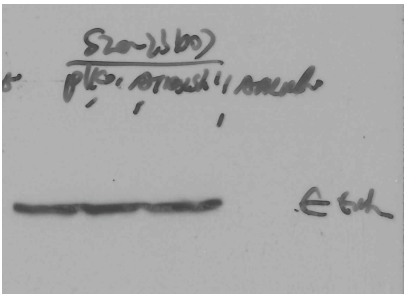

FigS7-Actin

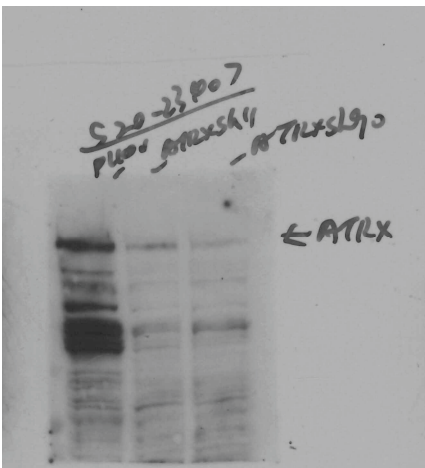

FigS7-ATRX-1



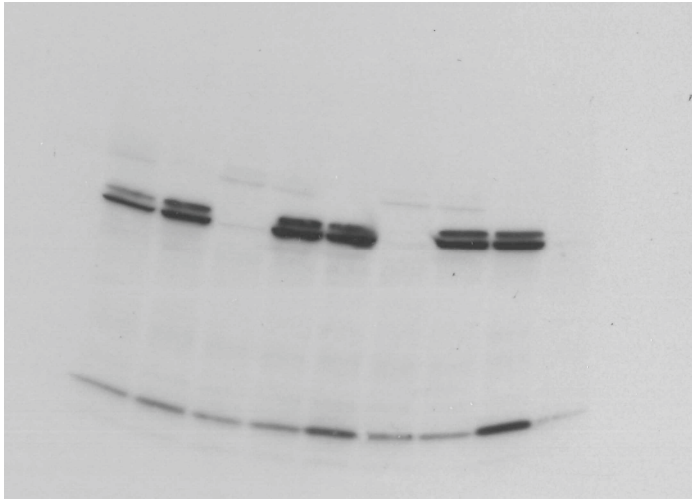

Fig10SA-pErk gH2AX-2
