# Supplementary material
Source: MDPI journal article supplement (https://www.mdpi.com/2072-6694/14/12/3015)
Supplement: s1 [file s1]

Archive with 2 entries (2 files):
- cancers-1784743-File S1.pdf
- cancers-1784743-supplementary.pdf
